# Supplementary material for: Comparative Omics and Trait Analyses of Marine Pseudoalteromonas Phages Advance the Phage OTU Concept
Source: PubMed Central journal article supplement (PMC5498523; doi:10.3389/fmicb.2017.01241), 2017-07-06
Supplement: Data_Sheet_1.pdf [file Data_Sheet_1.pdf]

*Supplementary Material*

**Comparative omics and trait analyses of marine *Pseudoalteromonas* phages advance the phage OTU concept**

Melissa B. Duhaime, Natalie Solonenko, Simon Roux, Nathan C. Verberkmoes, Antje Wichels<sup>5</sup>, Matthew B. Sullivan

\* Correspondence:

Melissa B. Duhaime: [duhaimem@umich.edu](mailto:duhaimem@umich.edu), Matthew B. Sullivan [mbsulli@gmail.com](mailto:mbsulli@gmail.com)

**1 Supplementary Figures and Tables**

**Hairball plot of *Pseudoalteromonas* phage genera**

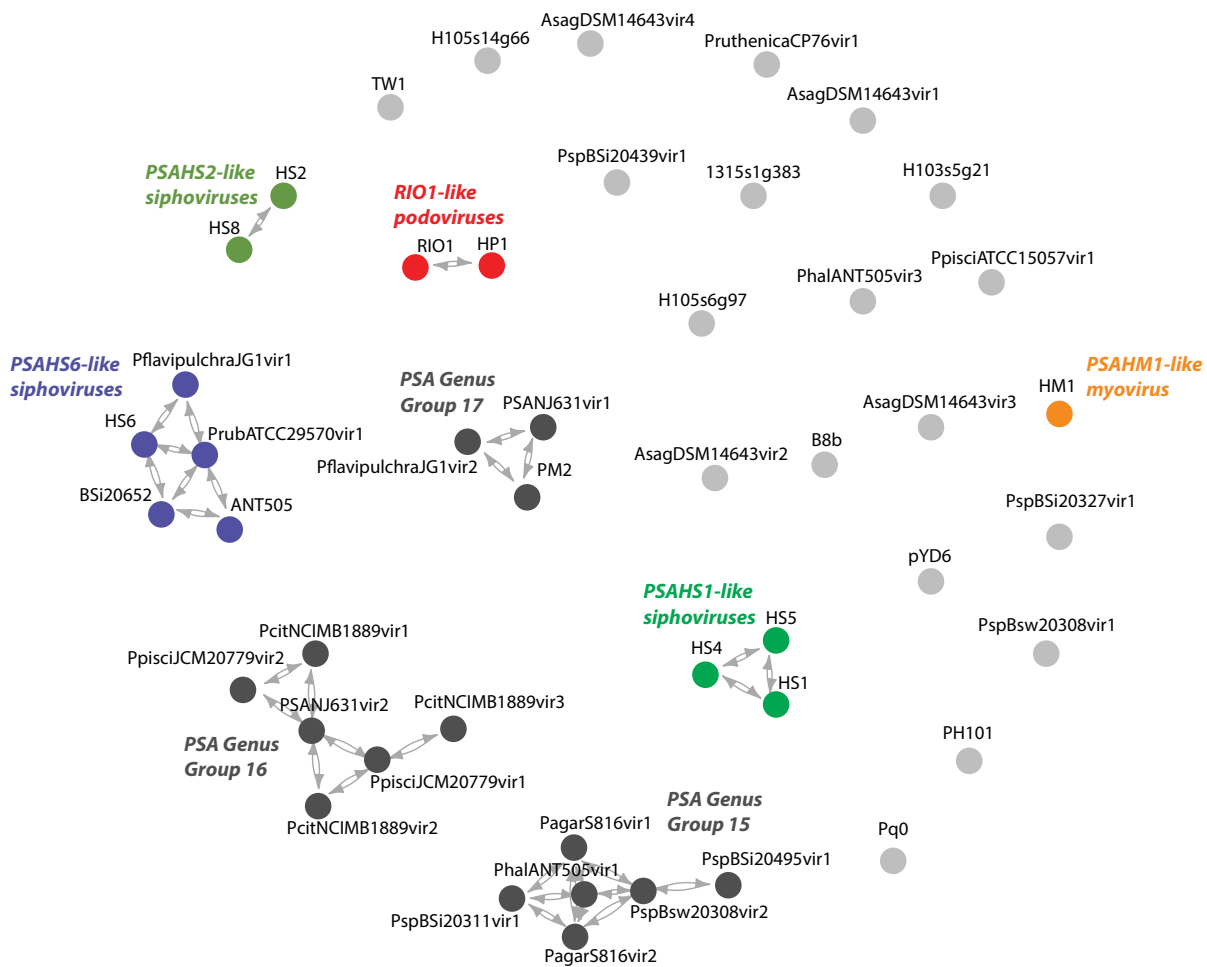

**Supplementary Figure 1.** Hairplot representation of the *Pseudoalteromonas* phage clusters. Directional arrows indicate that a phage shares 40% of its proteins with the phage it is pointing to. PSA Genera Group numbers are listed in Supplementary Table 1.

*Pseudoalteromonas* 16S rRNA gene phylogeny

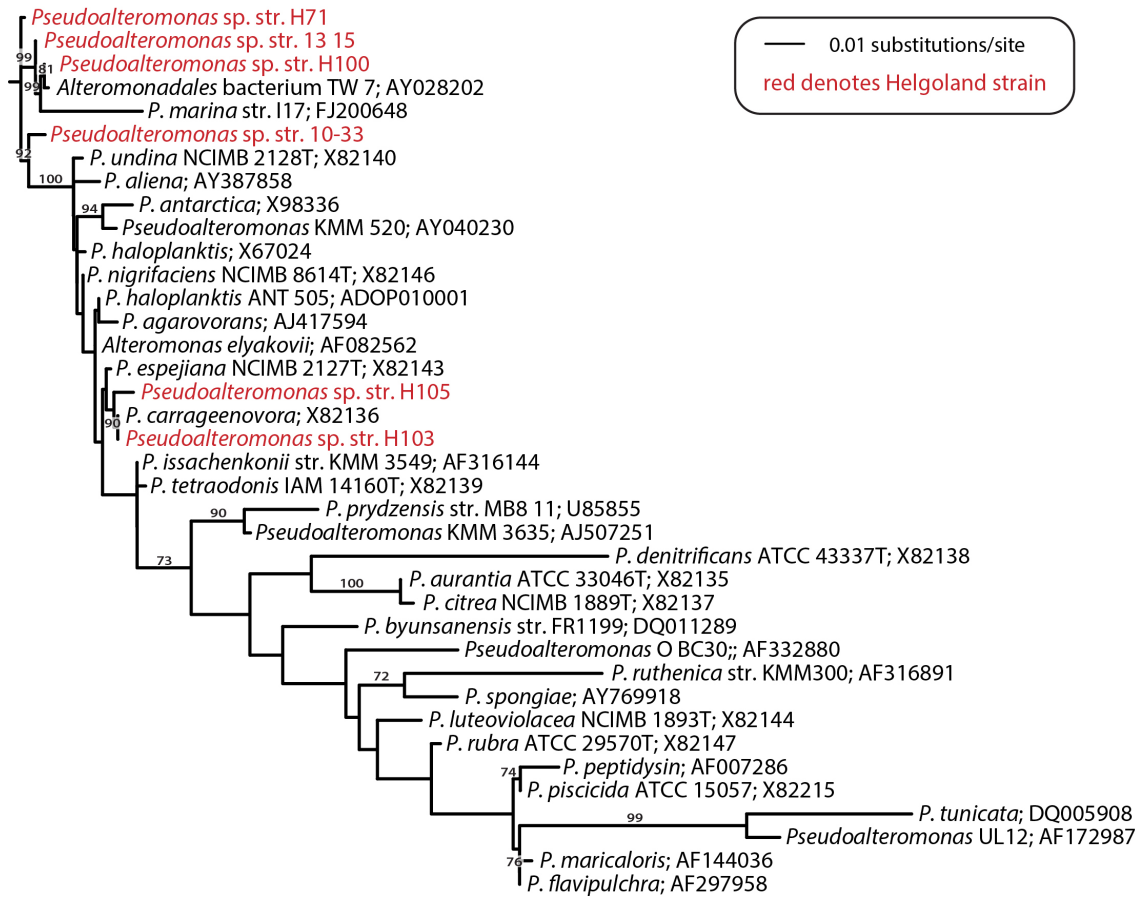

**Supplementary Figure 2.** 16S rRNA gene phylogeny for a subset of publicly available *Pseudoalteromonas* spp. and 6 Helgoland *Pseudoalteromonas* spp. (in red).

## Supplementary Material

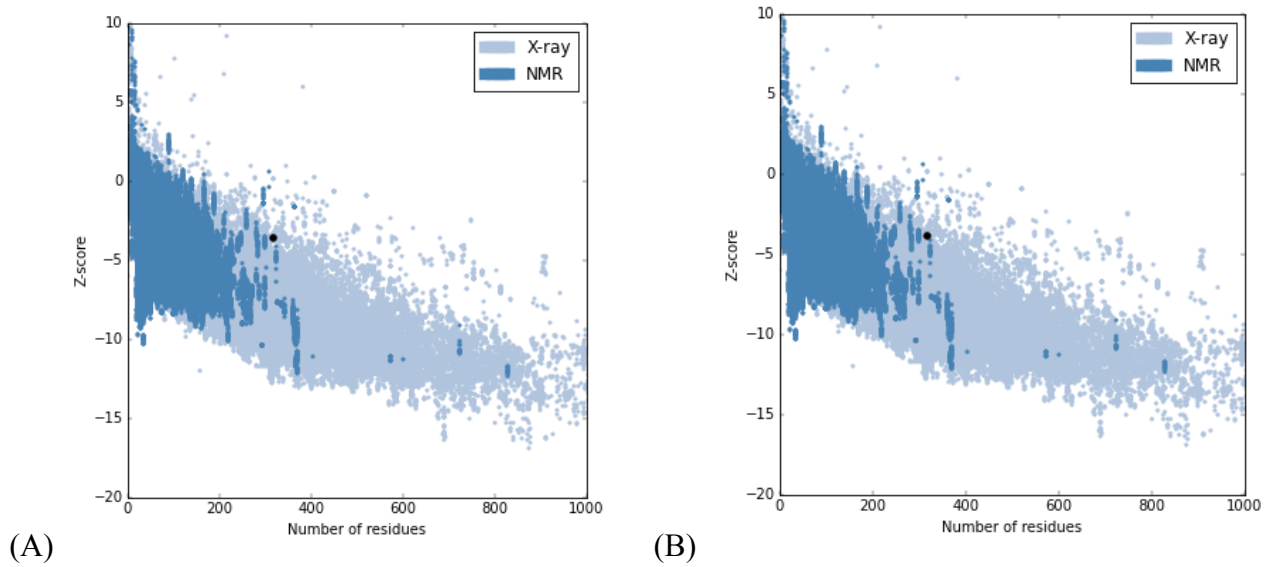

**Supplementary Figure 3.** Evaluation by ProSA software (Wiederstein and Sippl, 2007) of major capsid protein 3D model predicted by I-TASSER for: **(A)** PSAHS1\_00030 and PSAHS5\_00057, **(B)** PSAHS8\_00019. All z-scores of predicted structures (black dot in panels A and B) fall in range of those expected based on empirical X-ray- and NMR-generated structural data.

Supplementary Material

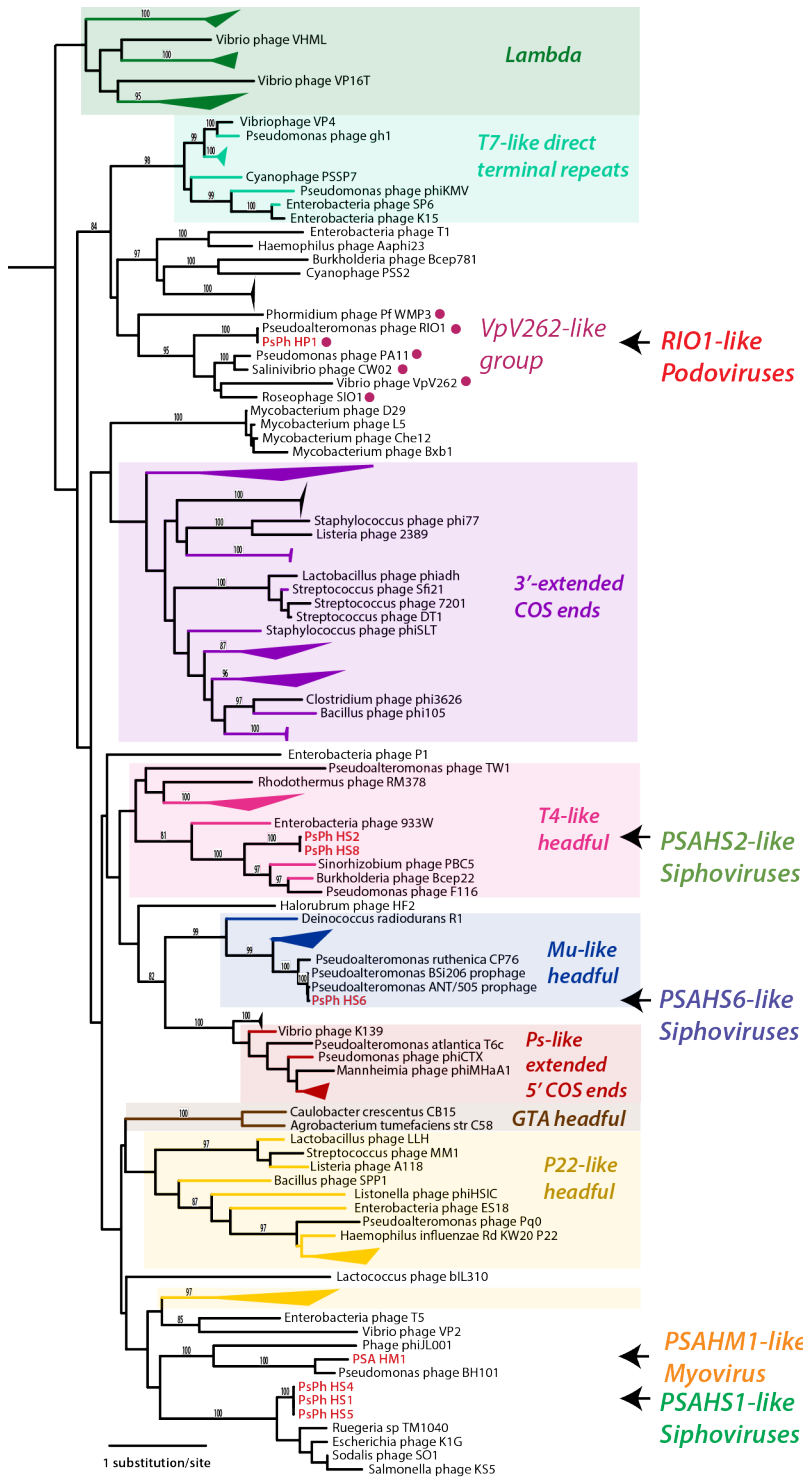

**Supplementary Figure 4.** Large terminase (terL) maximum likelihood-based protein phylogeny. Large terminase nodes and groups are colored based on phage DNA packaging mechanisms (Casjens *et al.*, 2005). Phages in the VpV262-like group cluster.

Supplementary Material

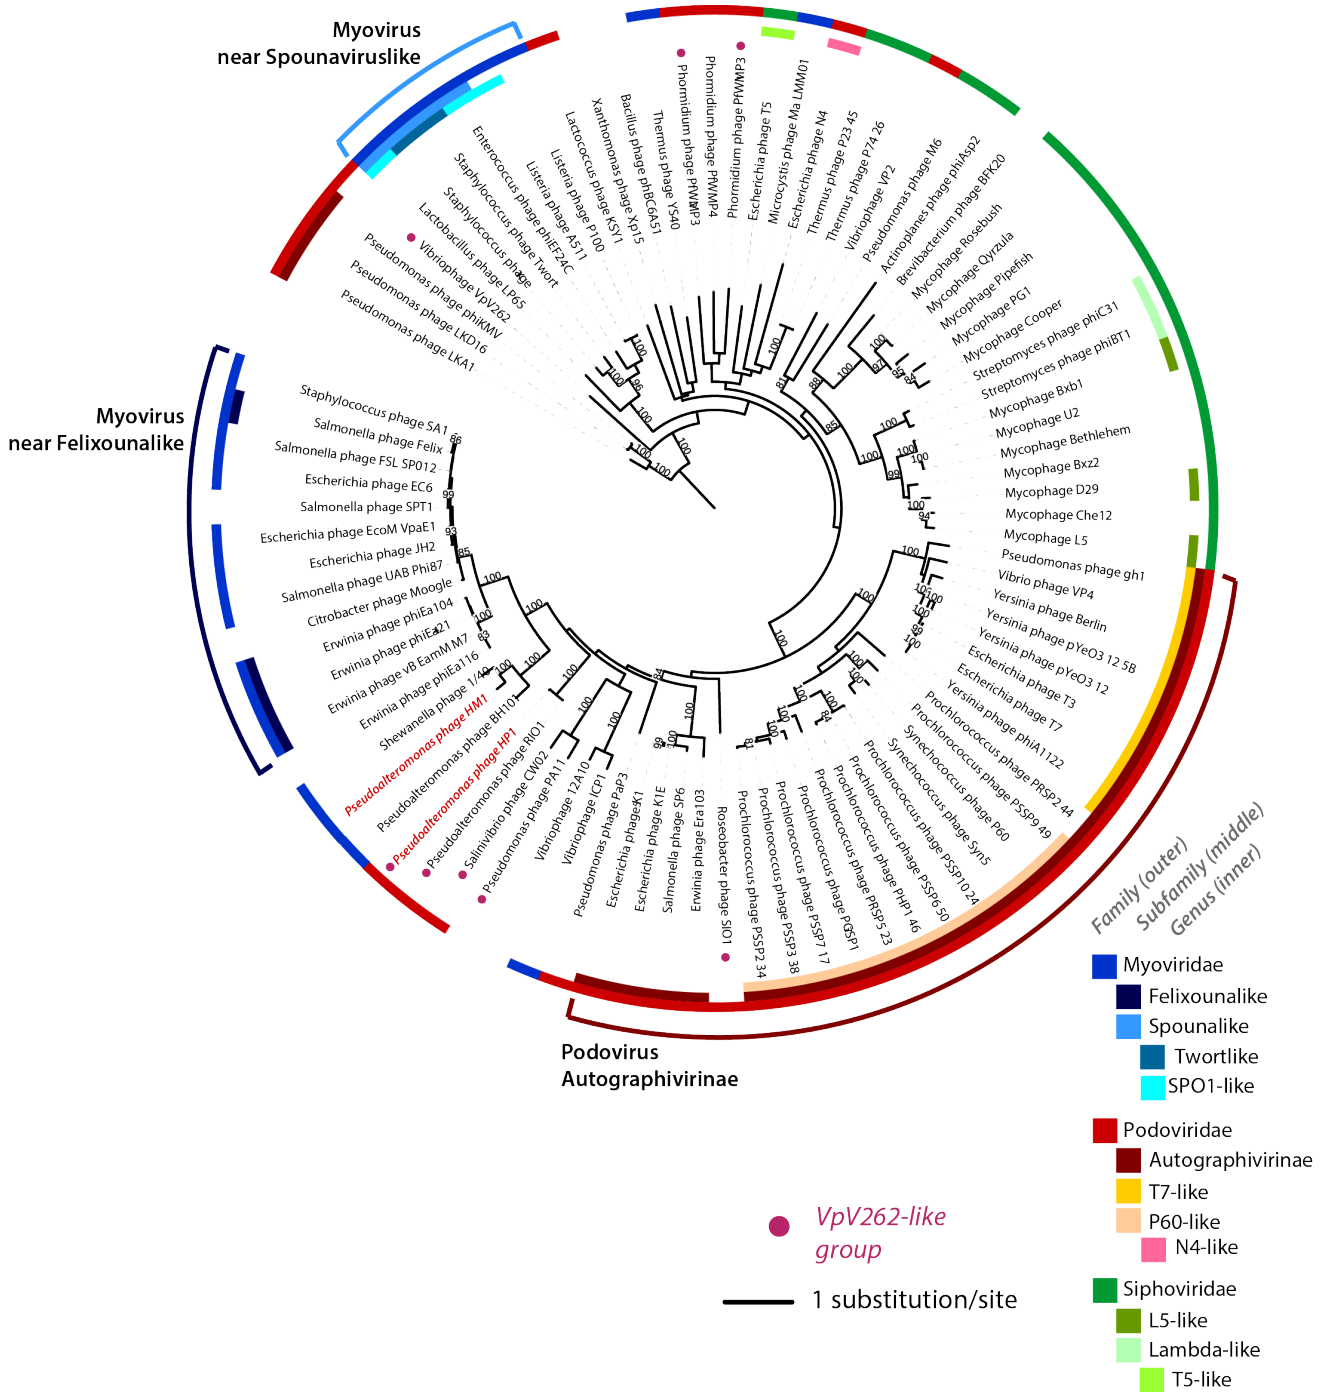

**Supplementary Figure 5.** DNA polymerase A (DNAPol) maximum likelihood-based protein phylogeny. Colorblocks indicate phage taxonomy and groups are colored based on phage DNA packaging mechanisms (Casjens *et al.*, 2005). Phages in the VpV262-like group are spread across the tree.

## Supplementary Material

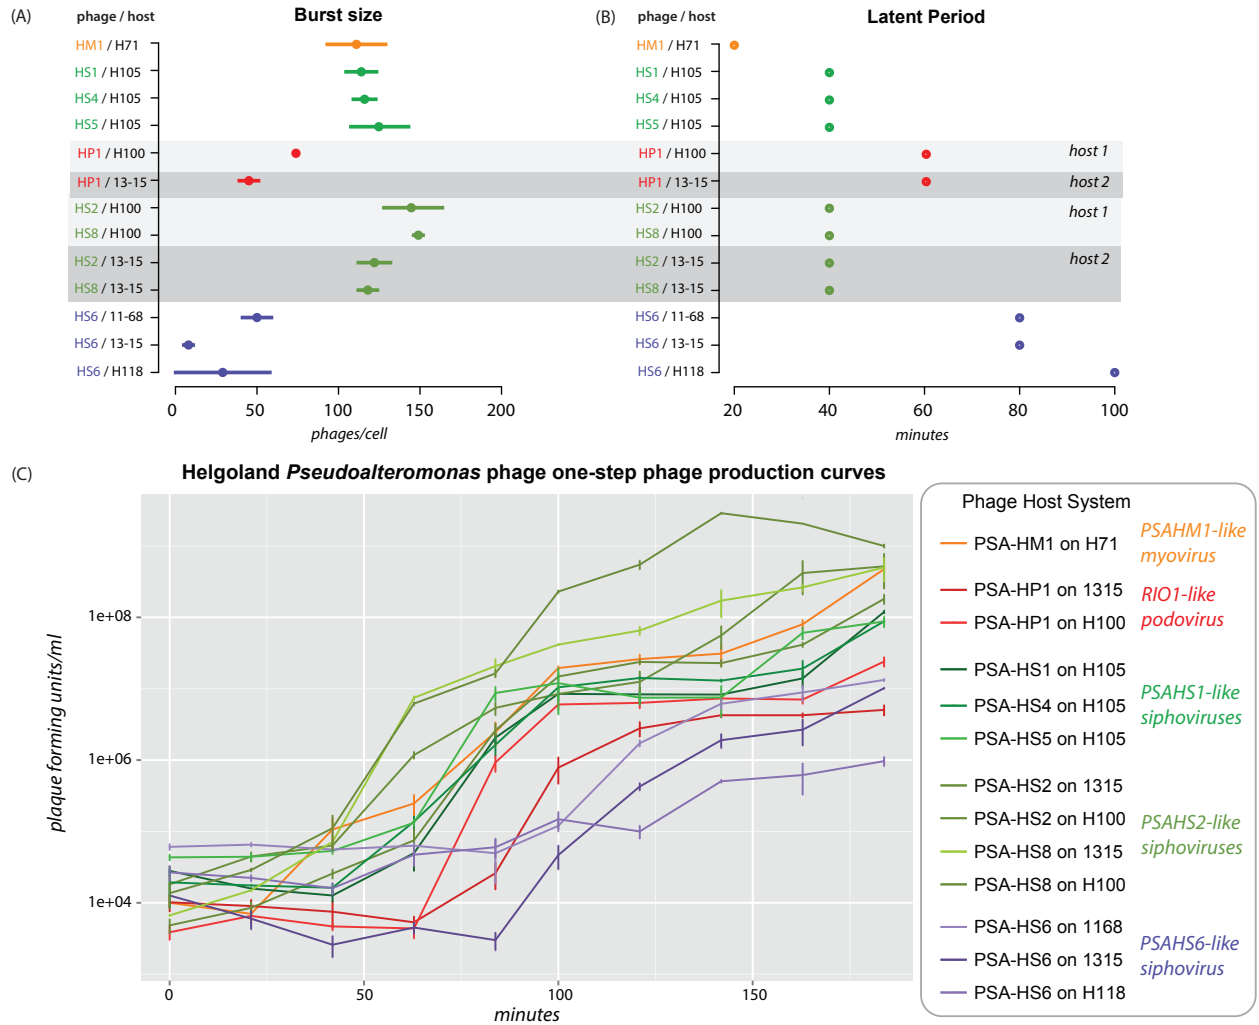

**Supplementary Figure 6.** Infection phenotype data for Helgoland *Pseudoalteromonas* phages and hosts. (A) Burst sizes, (B) latent periods, (C) one-step virus production curves.

**Supplementary Table 1 (data sheet 2.csv).** VirSorter output describing prophages predicted to be in *Pseudoalteromonas* phage genomes and WGS projects in GenBank. These identified prophages were used in the reciprocal best blast used in Figure 1 and Supplementary Figure 1.

**Supplementary Table 2 (data sheet 3.xlsx).** Annotation tables for all newly sequenced Helgoland phage isolates.

**Supplementary Table 3 (data sheet 4.xlsx).** Summary of mass spectroscopy-derived proteomic data for each protein (CDS) of each Helgoland phage isolate analyzed, including data for input to R script to recreate model SDS-PAGE gel in Figure 3.

## Methods for Supplementary Information:

### Gene phylogenies

Full-length 16S rRNA gene sequences were recovered from the sequenced host genome data using EMIRGE (Miller *et al.*, Banfield, 2011). Alignment for the 16S rRNA gene phylogeny was generated using the SINA aligner (Pruesse *et al.*, 2012). Alignments for terL and DNAPol protein phylogenies were generated with T-Coffee (Notredame *et al.*, 2000) with default parameters. Maximum likelihood trees were generated with RAxML v 7.3.0 based on 100 bootstraps and using the Generalized Time Reversible gamma model (Stamatakis 2006). Trees visualizations were generated in iTOL v2 (Letunic and Bork, 2016).

## References for Supplementary Information:

1. Casjens, S. R., Gilcrease, E. B., Winn-Stapley, D. A., Schicklmaier, P., Schmieger, H., Pedulla, M. L., Ford, M.E., Houtz, J.M., Hatfull, G.F., Hendrix, R. W. (2005). The generalized transducing salmonella bacteriophage ES18: Complete genome sequence and DNA packaging strategy. *J. Bacteriol.* **187**, 1091-104.
2. Letunic, I., Bork, P. (2016). Interactive tree of life (iTol) v3: An online tool for the display and annotation of phylogenetic and other trees. *Nucleic Acids Res.* **44**, W242-5.
3. Miller, C. S., Baker, B. J., Thomas, B. C., Singer, S. W., Banfield, J. F. (2011). EMIRGE: Reconstruction of full-length ribosomal genes from microbial community short read sequencing data. *Genome Biol.* **12**, R44.
4. Notredame, C., Higgins, D. G., Heringa, J. (2000). T-Coffee: A novel method for fast and accurate multiple sequence alignment. *J. Mol. Biol.* **302**, 205-217.
5. Pruesse, E., Peplies, J., Glöckner, F. O. (2012). SINA: Accurate high-throughput multiple sequence alignment of ribosomal RNA genes. *Bioinformatics*, **28**, 1823-1829.
6. Stamatakis, A. (2006). RAxML-VI-HPC: Maximum likelihood-based phylogenetic analyses with thousands of taxa and mixed models. *Bioinformatics*, **22**, 2688-2690.
7. Wiederstein, M., Sippl, M. J. (2007). ProSA-web: Interactive web service for the recognition of errors in three-dimensional structures of proteins. *Nucleic Acids Res.* **35**, W407-10.
